# Supplementary material
Source: publisher figshare collection journal article supplement (https://sage.figshare.com/ndownloader/files/31540144)
Supplement: Supplementary file 1 [file 31540144]

**Supplementary material 5: Social variables adjusted mutually**

Supplement material for Social Position and Functional Somatic Disorders bySigne U. Schovsbo, Thomas M. Dantoft, Betina H. Thuesen, Katja B. Leth-Møller, Lene F. Eplov, Marie W. Petersen, Torben Jørgensen, Merete Osler in Scandinavian Journal of Public Health.

Cohabitation

| **Cohabitation** | **Adjusted for sex, age and vocational training** | | | **Adjusted for sex, age and employment** | |
| --- | --- | --- | --- | --- | --- |
| **Cohabitation** | | **Non-cohabitation** | **Cohabitation** | **Non-cohabitation** |
| **OR (95 % CI)** | | **OR (95 % CI)** | **OR (95 % CI)** | **OR (95 % CI)** |
| **Traditional FSD** | | 1.00 (ref) | *1.25 (1.08-1.44)* | 1.00 (ref) | *1.28 (1.07-1.55)* |
| **IBS** | | 1.00 (ref) | 1.21 (0.93-1.57) | 1.00 (ref) | *1.49 (1.07-2.06)* |
| **FM** | | 1.00 (ref) | 1.05 (0.82-1.34) | 1.00 (ref) | 0.95 (0.68-1.31) |
| **CFS** | | 1.00 (ref) | *1.36 (1.15-1.61)* | 1.00 (ref) | *1.37 (1.10-1.70)* |
| **IBS-pure*** | | 1.00 (ref) | 1.07 (0.76-1.52) | 1.00 (ref) | 1.51 (0.99-2.31) |
| **FM-pure*** | | 1.00 (ref) | 0.94 (0.68-1.31) | 1.00 (ref) | 0.85 (0.53-1.35) |
| **CFS-pure*** | | 1.00 (ref) | *1.31 (1.07-1.60)* | 1.00 (ref) | *1.36 (1.06-1.75)* |
| **BDS** | | 1.00 (ref) | *1.31 (1.15-1.50)* | 1.00 (ref) | *1.36 (1.14-1.63)* |
| **Single-organ BDS*** | | 1.00 (ref) | *1.24 (1.08 -1.42)* | 1.00 (ref) | *1.27 (1.05-1.53)* |
| **Multi-organ BDS *** | | 1.00 (ref) | *2.79 (1.77-4.38)* | 1.00 (ref) | *3.22 (1.91-5.42)* |
| **Single symptom profiles*** | | 1.00 (ref) | *1.15 (1.03-1.29)* | 1.00 (ref) | *1.20 (1.03-1.41)* |
| **Multiple symptoms profiles*** | | 1.00 (ref) | *1.27 (1.08-1.49)* | 1.00 (ref) | *1.37 (1.09-1.71)* |
| **All symptoms profile*** | | 1.00 (ref) | *1.99 (1.42-2.78)* | 1.00 (ref) | *1.99 (1.33-3.00)* |

*Subgroup-analyses: IBS-pure: n=7817, FM-pure: n=7864, CFS-pure: n=8171,

Single-organ BDS: n= 8737, Multi-organ BDS: n=7525

Single symptom profiles: n=7634, Multiple symptoms profiles: n=5580, All symptoms profile: n=4721.

Employment

| **Employment** | **Adjusted for sex, age and cohabitation** | | **Adjusted for sex, age and vocational training** | |
| --- | --- | --- | --- | --- |
| **Employment** | **Unemployment** | **Employment** | **Unemployment** |
| **OR (95 % CI)** | **OR (95 % CI)** | **OR (95 % CI)** | **OR (95 % CI)** |
| **Traditional FSD** | 1.00 (ref) | *3.79 (3.04-4.73)* | 1.00 (ref) | *3.78 (3.03-4.71)* |
| **IBS** | 1.00 (ref) | *1.93 (1.28-2.90)* | 1.00 (ref) | *2.06 (1.36-3.10)* |
| **FM** | 1.00 (ref) | *3.68 (2.66-5.07)* | 1.00 (ref) | *3.40 (2.47-4.68)* |
| **CFS** | 1.00 (ref) | *4.14 (3.24-5.27)* | 1.00 (ref) | *4.17 (3.27-5.32)* |
| **IBS-pure** | 1.00 (ref) | 1.72 (0.92-3.18) | 1.00 (ref) | 1.83 (0.98-3.40) |
| **FM-pure** | 1.00 (ref) | *3.03 (1.88-4.88)* | 1.00 (ref) | *2.74 (1.71-4.41)* |
| **CFS-pure** | 1.00 (ref) | *4.08 (3.06-5.44)* | 1.00 (ref) | *4.13 (3.10-5.51)* |
| **BDS** | 1.00 (ref) | *4.38 (3.54-5.43)* | 1.00 (ref) | *4.31 (3.48-5.34)* |
| **Single-organ BDS*** | 1.00 (ref) | *4.01 (3.21-5.02)* | 1.00 (ref) | *3.91 (3.13-4.88)* |
| **Multi-organ BDS*** | 1.00 (ref) | *9.96 (5.84-17.01)* | 1.00 (ref) | *10.54 (6.17-18.00)* |
| **Single symptoms profiles*** | 1.00 (ref) | *1.95(1.50-2.53)* | 1.00 (ref) | *4.13 (3.10-5.51)* |
| **Multiple symptoms profiles*** | 1.00 (ref) | *6.17 (4.64-8.20)* | 1.00 (ref) | *6.13 (4.61-8.15)* |
| **All symptoms profile*** | 1.00 (ref) | *9.54 (6.16-14.78)* | 1.00 (ref) | *9.32 (6.01-14.45)* |

*Subgroup-analyses: IBS-pure: n=4647, FM-pure: n=4661, CFS-pure: n=4901

Single-organ BDS: n= 5239, Multi-organ BDS: n=4462,

Single symptom profiles: n=4551, Multiple symptoms profiles: n=3327, All symptoms profile: n=2831.
